# Supplementary material
Source: PubMed Central journal article supplement (PMC4579460)
Supplement: AEM.01781-15_zam999116643so1.pdf [file AEM.01781-15_zam999116643so1.pdf]

## Supplemental Material – A quantitative analysis of *Lysobacter* predation

Ivana Seccareccia,<sup>1</sup> Christian Kost,<sup>2</sup> and Markus Nett<sup>1\*</sup>

<sup>1</sup>Junior Research Group "Secondary Metabolism of Predatory Bacteria", Leibniz Institute for Natural Product Research and Infection Biology, Hans-Knöll-Institute, 07745 Jena, Germany

<sup>2</sup>Research group "Experimental Ecology and Evolution", Max Planck Institute for Chemical Ecology, 07745 Jena, Germany

\*Corresponding author. Mailing address: Leibniz Institute for Natural Product Research and Infection Biology, Hans-Knöll-Institute, Adolf-Reichwein-Str. 23, 07745 Jena, Germany. Phone: 49 3641 532 1297. Fax: 49 3641 532 0811. E-mail: [markus.nett@hki-jena.de](mailto:markus.nett@hki-jena.de)

### Table of Contents

|      |          |                                                                                                                                                                     |
|------|----------|---------------------------------------------------------------------------------------------------------------------------------------------------------------------|
| SI-2 | Fig. S1  | OD <sub>600</sub> -CFU plots for <i>Lysobacter capsici</i> , <i>L. enzymogenes</i> , <i>L. oryzae</i> , and <i>Myxococcus fulvus</i>                                |
| SI-3 | Fig. S2  | OD <sub>600</sub> -CFU plots for <i>Agrobacterium tumefaciens</i> , <i>Bacillus subtilis</i> , <i>Chromobacterium pseudoviolaceum</i> , and <i>Escherichia coli</i> |
| SI-4 | Fig. S3  | OD <sub>600</sub> -CFU plots for <i>Lactococcus lactis</i> , <i>Pseudomonas fluorescens</i> , <i>Ralstonia solanacearum</i> , and <i>Rhodococcus rhodochrous</i>    |
| SI-5 | Fig. S4  | Work flow for the CFU-based predation assay                                                                                                                         |
| SI-6 | Fig. S5  | Plasmid stability analysis                                                                                                                                          |
| SI-7 | Fig. S6  | Testing of <i>Myxococcus fulvus</i> in the CFU-based predation assay                                                                                                |
| SI-8 | Table S1 | Swarm expansion in the lawn predation assay                                                                                                                         |
| SI-9 | Table S2 | Evaluation of predation efficiency                                                                                                                                  |

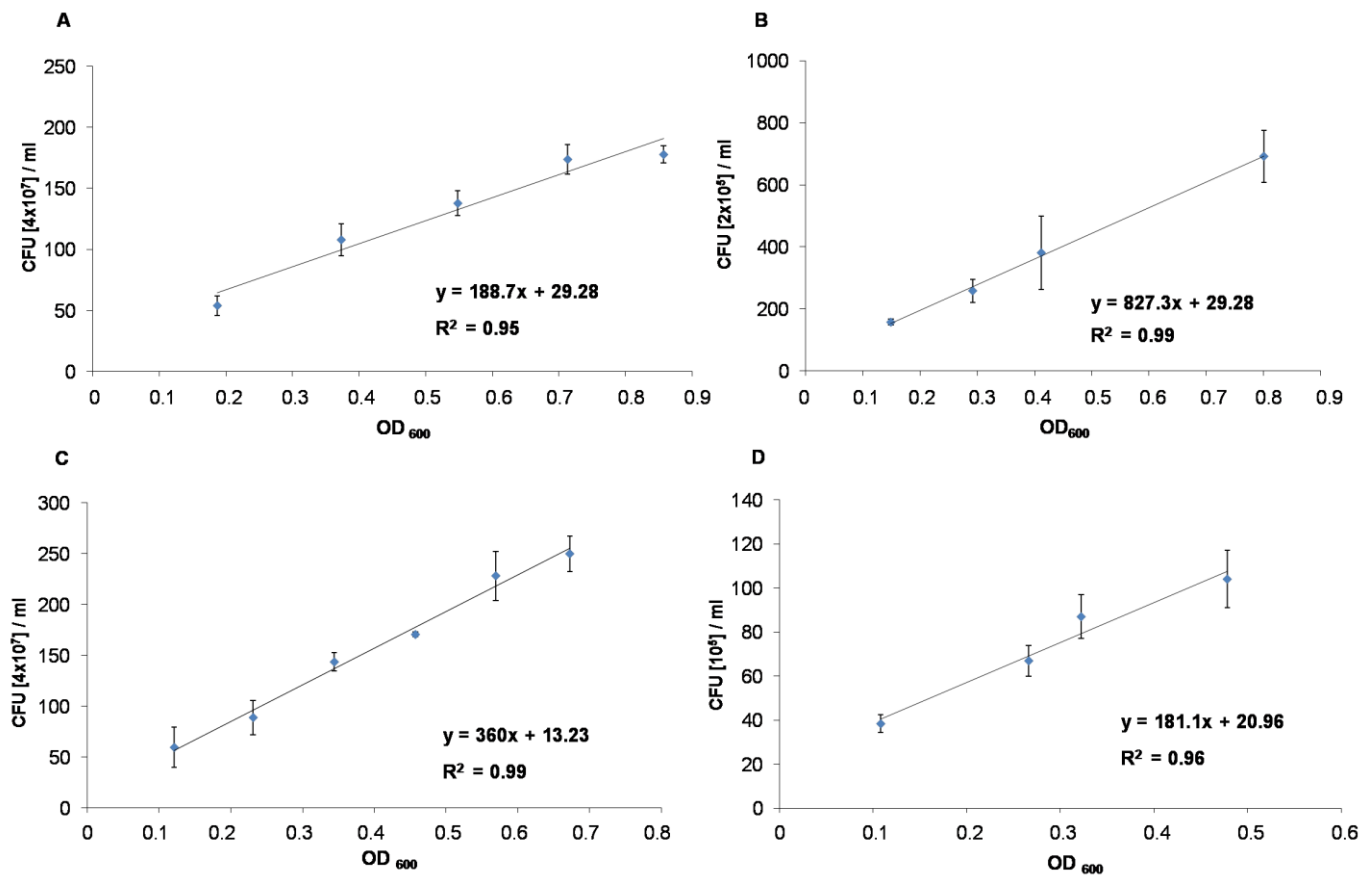

**Figure S1.** OD<sub>600</sub>-CFU plot for *Lysobacter capsici* DSM 19286 (A), *L. enzymogenes* DSM 2043 (B), *L. oryzae* DSM 21044 (C), and *Myxococcus fulvus* ST035975 (D). Linear regression analysis was used for estimating the relationship between optical density at 600 nm (OD<sub>600</sub>) and CFU/ml. Prediction was made within the range of values in the dataset used for model-fitting.

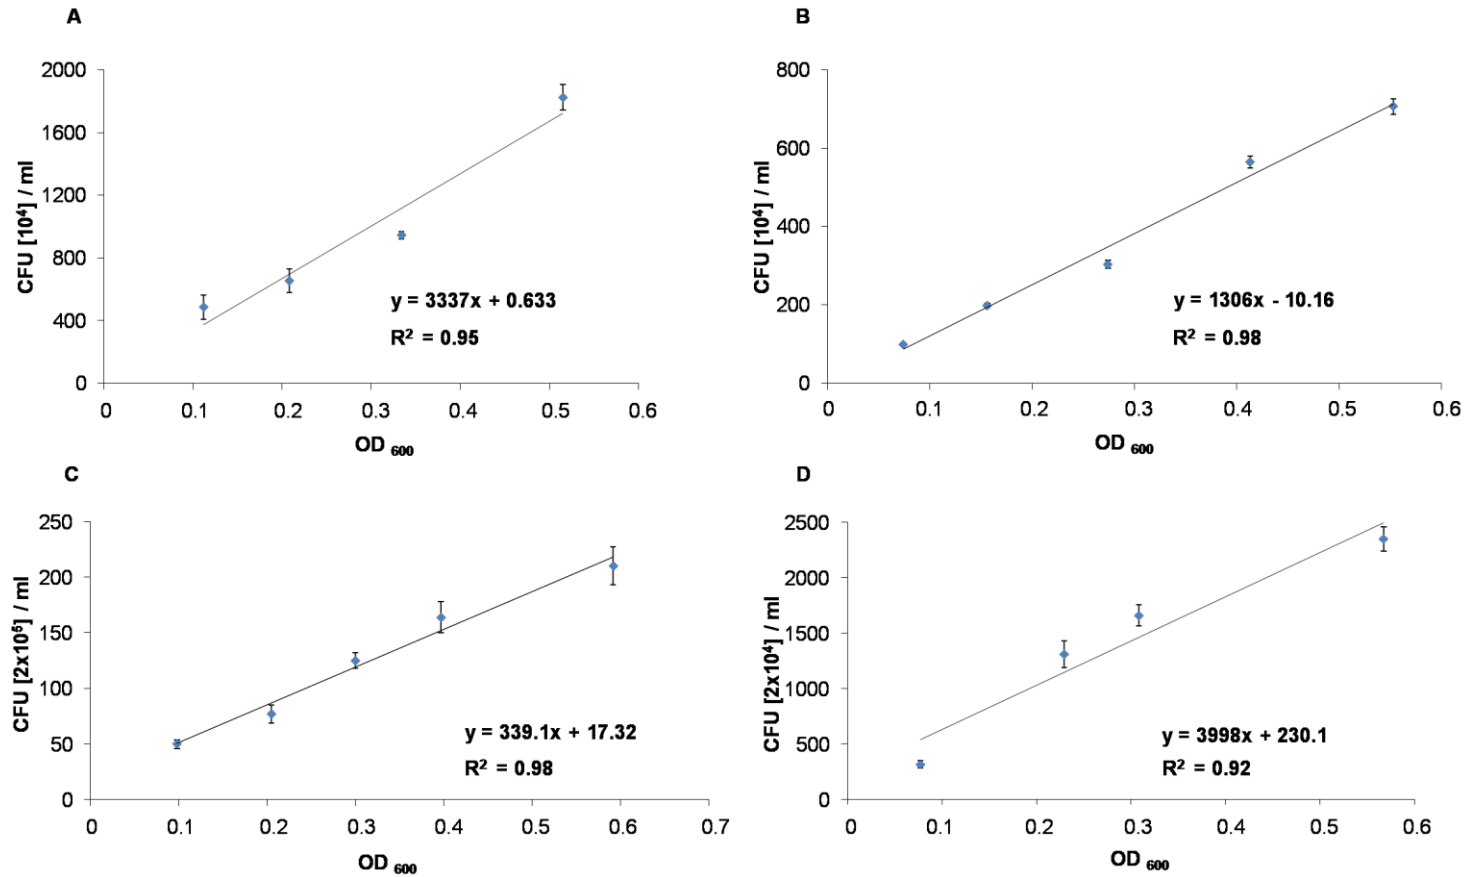

**Figure S2.** OD<sub>600</sub>-CFU plot for *Agrobacterium tumefaciens* DSM 5172 (A), *Bacillus subtilis* DSM 347 (B), *Chromobacterium pseudoviolaceum* DSM 23279 (C), and *Escherichia coli* DSM 18039 (D). Linear regression analysis was used for estimating the relationship between optical density at 600 nm (OD<sub>600</sub>) and CFU/ml. Prediction was made within the range of values in the dataset used for model-fitting.

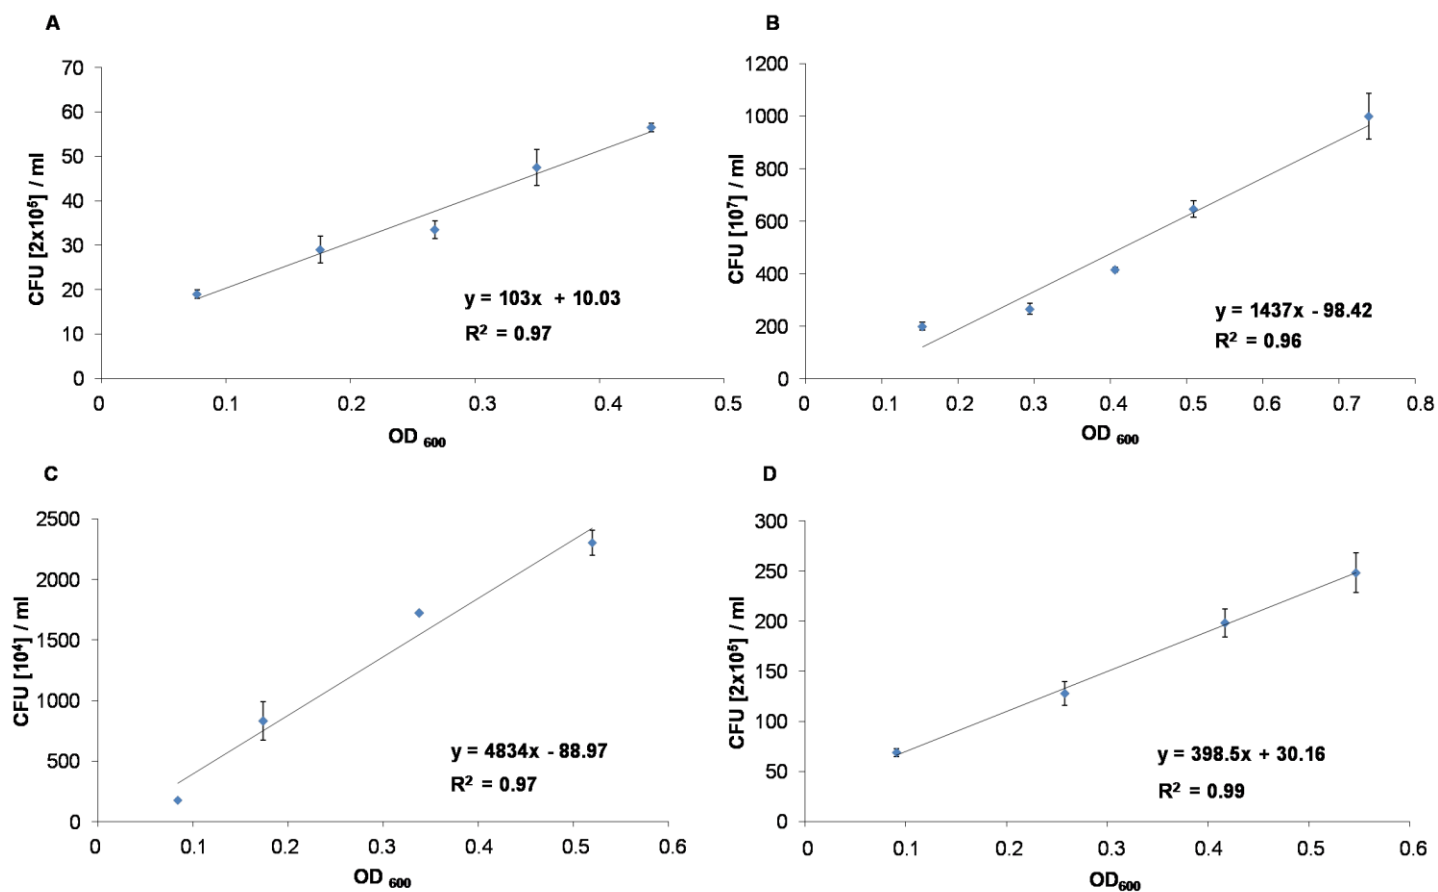

**Figure S3.** OD<sub>600</sub>-CFU plot for *Lactococcus lactis* DSM 20069 (A), *Pseudomonas fluorescens* DSM 11532 (B), *Ralstonia solanacearum* GMI1000 (C), and *Rhodococcus rhodochrous* DSM 43334 (D). Linear regression analysis was used for estimating the relationship between optical density at 600 nm (OD<sub>600</sub>) and CFU/ml. Prediction was made within the range of values in the dataset used for model-fitting.

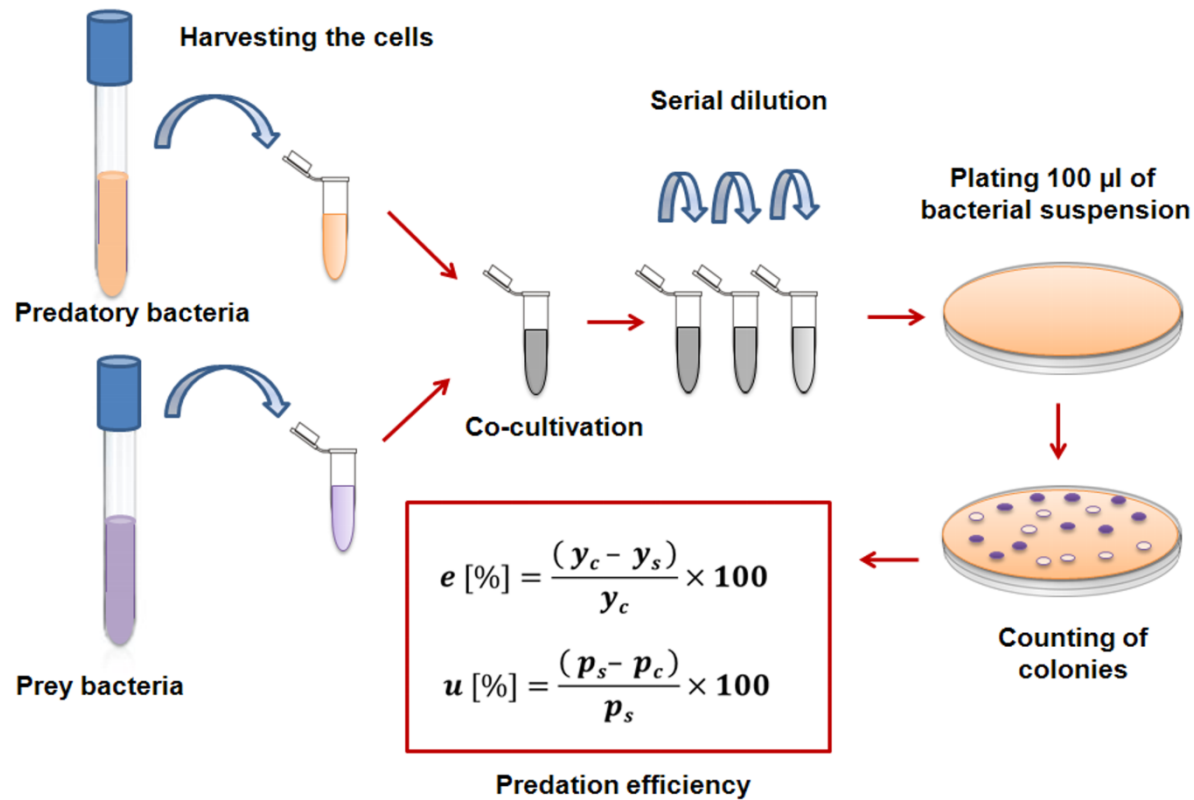

**Figure S4.** Work flow for the CFU-based predation assay and equations to calculate the predator's killing efficiency ( $e$ ) and its utilization of prey ( $u$ ). The variables were defined as follows:  $y_c$  = colony-forming units of the prey bacterium that had been grown in the absence of a predator;  $y_s$  = colony-forming units (CFUs) of the prey bacterium that had been cocultured with a predator;  $p_c$  = CFUs of the predatory bacterium that had been grown in the absence of prey;  $p_s$  = CFUs of the predatory bacterium that had been cocultured with a prey bacterium.

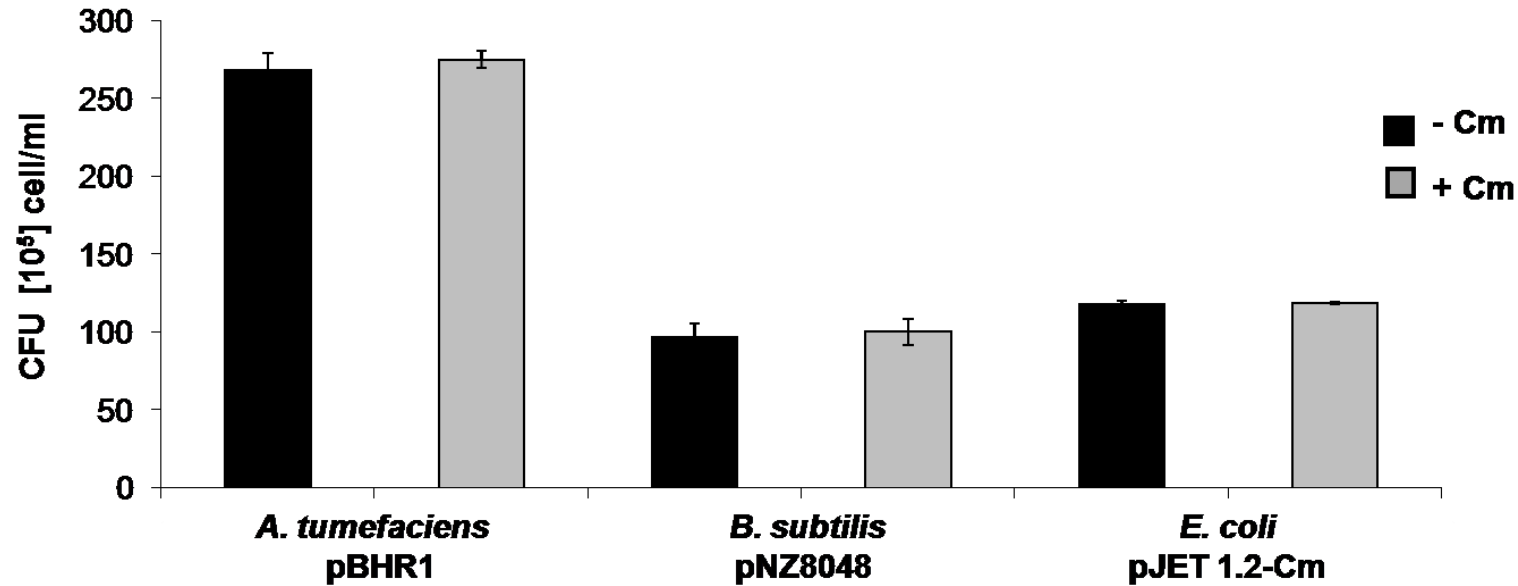

**Figure S5.** Plasmid stability analysis of *A. tumefaciens*/pBHR1, *B. subtilis*/pNZ8048, and *E. coli*/pJET1.2-cf. Bacteria were cultured in 5 ml LB medium supplemented with chloramphenicol ( $25 \mu\text{g ml}^{-1}$ ). After 48 h, 2 ml of each bacterial culture were harvested by centrifugation (1,200 g,  $4^\circ\text{C}$ , 5 min). The supernatant was removed and the cell pellet was washed three times with 2 ml of PBS buffer and, finally, resuspended in 1.6 ml of PBS buffer. From these suspensions, 370  $\mu\text{l}$  aliquots (cell concentration adjusted to  $1 \times 10^6$  cells  $\text{ml}^{-1}$ ) were mixed with the same amount of either PBS buffer or PBS buffer supplemented with chloramphenicol ( $25 \mu\text{g ml}^{-1}$ ). Incubation was then continued for 24 h at  $30^\circ\text{C}$ , before serial dilutions of the cultures were prepared and spread on LB agar plates containing chloramphenicol ( $25 \mu\text{g ml}^{-1}$ ). The CFU number was determined, as described for the CFU-based predation assay. None of the tested strains showed a significant plasmid loss, which is consistent with previous studies (cf. **Weber AE, San K-Y.** 1990. Population dynamics of a recombinant culture in a chemostat under prolonged cultivation. *Biotechnol. Bioengineering.* **36**:727-736).

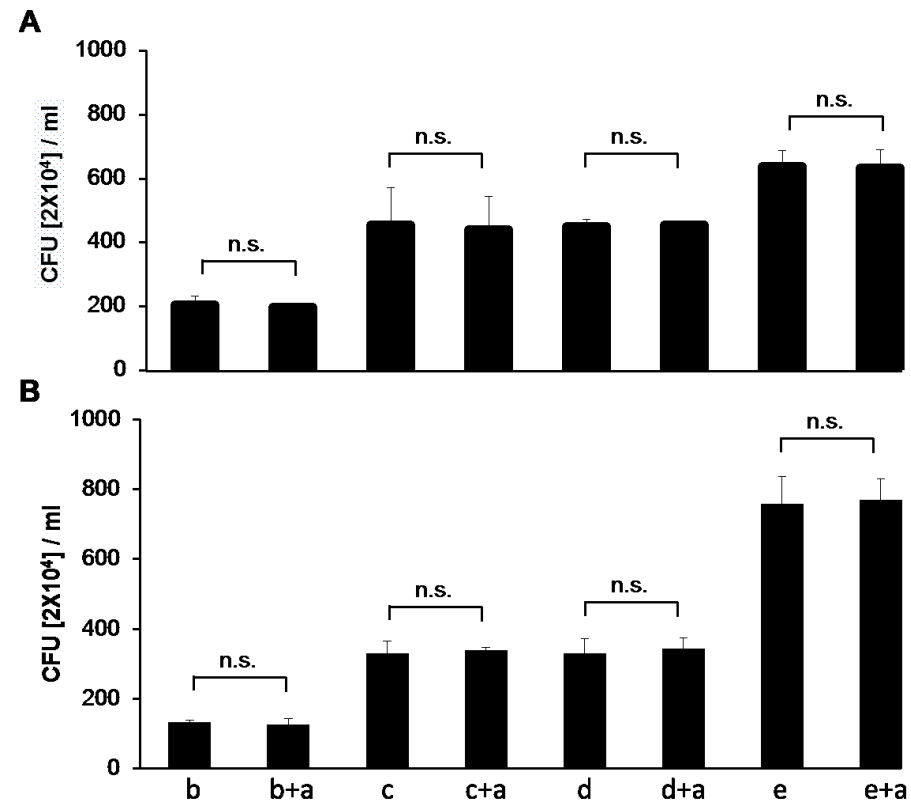

**Figure S6.** Testing of *Myxococcus fulvus* in the CFU-based predation assay. Mean ( $\pm 95\%$  confidence interval) CFU of (b) *B. subtilis*, (c) *C. pseudoviolaceum*, (d) *E. coli* and (e) *R. rhodochrous* grown in the absence or presence of (a) the predatory bacterium *M. fulvus*. Monocultures of prey served as controls to assess the reduction efficiency after (A) 24 h, and (B) and 48 h (n.s., not significant).

**Table S1.** Swarm expansion in the lawn predation assay. Mean ( $\pm$  95% confidence interval, n=3) of the swarm diameter [in mm] on each prey bacterium after one and ten days (d) of incubation.

|                               | Prey species             |                |                           |               |                         |                |                           |                |                       |                |
|-------------------------------|--------------------------|----------------|---------------------------|---------------|-------------------------|----------------|---------------------------|----------------|-----------------------|----------------|
|                               | <i>Bacillus subtilis</i> |                | <i>C. pseudoviolaceum</i> |               | <i>Escherichia coli</i> |                | <i>Micrococcus luteus</i> |                | <i>R. rhodochrous</i> |                |
| Predator species              | 1 d                      | 10 d           | 1 d                       | 10 d          | 1 d                     | 10 d           | 1 d                       | 10 d           | 1 d                   | 10 d           |
| <i>Myxococcus fulvus</i>      | 4.0 $\pm$ 1.0            | 14.6 $\pm$ 0.6 | 5.0 $\pm$ 1.2             | 6.0 $\pm$ 1.3 | 8.0 $\pm$ 1.0           | 42.6 $\pm$ 2.8 | 9.0 $\pm$ 1.0             | 24.6 $\pm$ 5.9 | 6.0 $\pm$ 1.0         | 8.0 $\pm$ 1.0  |
| <i>Lysobacter capsici</i>     | 8.3 $\pm$ 0.6            | 9.6 $\pm$ 0.7  | 7.0 $\pm$ 1.0             | 7.4 $\pm$ 1.0 | 6.0 $\pm$ 1.0           | 7.6 $\pm$ 0.6  | 9.6 $\pm$ 1.3             | 10.3 $\pm$ 0.6 | 7.4 $\pm$ 1.0         | 7.4 $\pm$ 1.0  |
| <i>Lysobacter enzymogenes</i> | 7.0 $\pm$ 0.2            | 7.6 $\pm$ 0.7  | 4.6 $\pm$ 0.6             | 5.6 $\pm$ 0.6 | 9.6 $\pm$ 1.3           | 24.3 $\pm$ 1.3 | 8.0 $\pm$ 1.0             | 11.3 $\pm$ 0.6 | 7.4 $\pm$ 1.0         | 12.3 $\pm$ 0.6 |
| <i>Lysobacter oryzae</i>      | 9.0 $\pm$ 0.2            | 9.6 $\pm$ 0.6  | 7.0 $\pm$ 1.0             | 7.0 $\pm$ 1.0 | 9.3 $\pm$ 0.6           | 9.6 $\pm$ 0.7  | 8.6 $\pm$ 1.7             | 9.6 $\pm$ 0.6  | 8.0 $\pm$ 1.0         | 8.0 $\pm$ 1.0  |



**Table S2.** Evaluation of predation efficiency in the CFU-based predation assay ( $e$  = killing efficiency;  $u$  = prey utilization; n.d. = not determined).

|                               | Prey species                     |         |                          |            |                           |            |                         |            |
|-------------------------------|----------------------------------|---------|--------------------------|------------|---------------------------|------------|-------------------------|------------|
|                               | <i>Agrobacterium tumefaciens</i> |         | <i>Bacillus subtilis</i> |            | <i>C. pseudoviolaceum</i> |            | <i>Escherichia coli</i> |            |
| Predator species              | $e$ [%]                          | $u$ [%] | $e$ [%]                  | $u$ [%]    | $e$ [%]                   | $u$ [%]    | $e$ [%]                 | $u$ [%]    |
| <i>Lysobacter capsici</i>     | 14.0 ± 1.0                       | n.d.    | 96.5 ± 0.4               | 19.0 ± 1.5 | 90.0 ± 1.5                | 23.7 ± 0.2 | 19.0 ± 1.5              | 3.8 ± 1.2  |
| <i>Lysobacter enzymogenes</i> | 8.5 ± 0.1                        | n.d.    | 62.6 ± 1.8               | 1.0 ± 0.5  | 9.4 ± 0.1                 | 9.6 ± 0.4  | 14.6 ± 0.7              | 8.3 ± 1.5  |
| <i>Lysobacter oryzae</i>      | 12.0 ± 0.2                       | n.d.    | 98.1 ± 1.0               | 15.3 ± 1.5 | 100.0 ± 0.0               | 26.6 ± 0.1 | 20.0 ± 1.8              | 13.4 ± 2.5 |

|                               | Prey species              |             |                                |         |                               |         |                                |            |
|-------------------------------|---------------------------|-------------|--------------------------------|---------|-------------------------------|---------|--------------------------------|------------|
|                               | <i>Lactococcus lactis</i> |             | <i>Pseudomonas fluorescens</i> |         | <i>Ralstonia solanacearum</i> |         | <i>Rhodococcus rhodochrous</i> |            |
| Predator species              | $e$ [%]                   | $u$ [%]     | $e$ [%]                        | $u$ [%] | $e$ [%]                       | $u$ [%] | $e$ [%]                        | $u$ [%]    |
| <i>Lysobacter capsici</i>     | 68.4 ± 7.5                | 16.2 ± 1.5  | 1.0 ± 0.1                      | n.d.    | 2.69 ± 2.0                    | n.d.    | 97.6 ± 0.9                     | 21.6 ± 0.4 |
| <i>Lysobacter enzymogenes</i> | 99.0 ± 1.5                | 13.7 ± 0.36 | 1.2 ± 0.1                      | n.d.    | 0.5 ± 1.0                     | n.d.    | 4.2 ± 0.4                      | 10.6 ± 2.2 |
| <i>Lysobacter oryzae</i>      | 99.1 ± 1.5                | 17.7 ± 0.7  | 1.4 ± 0.6                      | n.d.    | 11.6 ± 7.6                    | n.d.    | 96.8 ± 0.8                     | 20.0 ± 0.1 |
